# Supplementary material for: Investigation of the Local Recurrence Rate after Colorectal Endoscopic Mucosal Resection: Is Incomplete Polyp Resection Really a Clinically Important Problem? Analysis of the Rationale for the “Resect and Discard” Strategy
Source: Can J Gastroenterol Hepatol. 2019 Jan 8;2019:7243515. doi: 10.1155/2019/7243515 (PMC6341238; doi:10.1155/2019/7243515)
Supplement: Supplementary Materials — STROBE Statement—Checklist of items that should be included in reports of cohort studies. [file 7243515.f1.docx]

**STROBE**

STROBE Statement—Checklist of items that should be included in reports of ***cohort studies***

|  | **Item No** | **Recommendation** |
| --- | --- | --- |
| **Title and abstract** | 1 | (*a*) Indicate the study’s design with a commonly used term in the title or the abstract 1-2 |
| (*b*) Provide in the abstract an informative and balanced summary of what was done and what was found 2 |
| **Introduction** | | |
| Background/rationale | 2 | Explain the scientific background and rationale for the investigation being reported 3-4 |
| Objectives | 3 | State specific objectives, including any prespecified hypotheses 3-4 |
| **Methods** | | |
| Study design | 4 | Present key elements of study design early in the paper 4 |
| Setting | 5 | Describe the setting, locations, and relevant dates, including periods of recruitment, exposure, follow-up, and data collection 4-6 |
| Participants | 6 | (*a*) Give the eligibility criteria, and the sources and methods of selection of participants. Describe methods of follow-up 4-6 |
| (*b*)For matched studies, give matching criteria and number of exposed and unexposed 7 |
| Variables | 7 | Clearly define all outcomes, exposures, predictors, potential confounders, and effect modifiers. Give diagnostic criteria, if applicable 5 |
| Data sources/ measurement | 8* | For each variable of interest, give sources of data and details of methods of assessment (measurement). Describe comparability of assessment methods if there is more than one group 4-6 |
| Bias | 9 | Describe any efforts to address potential sources of bias N/A |
| Study size | 10 | Explain how the study size was arrived at 4, 7 |
| Quantitative variables | 11 | Explain how quantitative variables were handled in the analyses. If applicable, describe which groupings were chosen and why 4-6 |
| Statistical methods | 12 | (*a*) Describe all statistical methods, including those used to control for confounding 6-7 |
| (*b*) Describe any methods used to examine subgroups and interactions 6-7 |
| (*c*) Explain how missing data were addressed N/A |
| (*d*) If applicable, explain how loss to follow-up was addressed N/A |
| (*e*) Describe any sensitivity analyses N/A |
| **Results** | | |
| Participants | 13* | (a) Report numbers of individuals at each stage of study—eg numbers potentially eligible, examined for eligibility, confirmed eligible, included in the study, completing follow-up, and analysed 7-8 |
| (b) Give reasons for non-participation at each stage 7 (Fig1) |
| (c) Consider use of a flow diagram 7 |
| Descriptive data | 14* | (a) Give characteristics of study participants (eg demographic, clinical, social) and information on exposures and potential confounders 7-8 |
| (b) Indicate number of participants with missing data for each variable of interest 7-8 |
| (c) Summarise follow-up time (eg, average and total amount) 7-8 |
| Outcome data | 15* | Report numbers of outcome events or summary measures over time 7-8 |
| Main results | 16 | (*a*) Give unadjusted estimates and, if applicable, confounder-adjusted estimates and their precision (eg, 95% confidence interval). Make clear which confounders were adjusted for and why they were included 7-8 |
| (*b*) Report category boundaries when continuous variables were categorized N/A |
| (*c*) If relevant, consider translating estimates of relative risk into absolute risk for a meaningful time period N/A |
| Other analyses | 17 | Report other analyses done—eg analyses of subgroups and interactions, and sensitivity analyses 7-8 |
| **Discussion** | | |
| Key results | 18 | Summarise key results with reference to study objectives 9-10 |
| Limitations | 19 | Discuss limitations of the study, taking into account sources of potential bias or imprecision. Discuss both direction and magnitude of any potential bias 10-11 |
| Interpretation | 20 | Give a cautious overall interpretation of results considering objectives, limitations, multiplicity of analyses, results from similar studies, and other relevant evidence 8-12 |
| Generalisability | 21 | Discuss the generalisability (external validity) of the study results 9-12 |
| **Other information** | | |
| Funding | 22 | Give the source of funding and the role of the funders for the present study and, if applicable, for the original study on which the present article is based N/A |
